# Supplementary material for: Bmp and Nodal Independently Regulate lefty1 Expression to Maintain Unilateral Nodal Activity during Left-Right Axis Specification in Zebrafish
Source: PubMed Central journal article supplement (PMC3183088; doi:10.1371/journal.pgen.1002289), 2011-09-29
Supplement: pgen.1002289.s006.pdf [file pgen.1002289.s006.pdf]

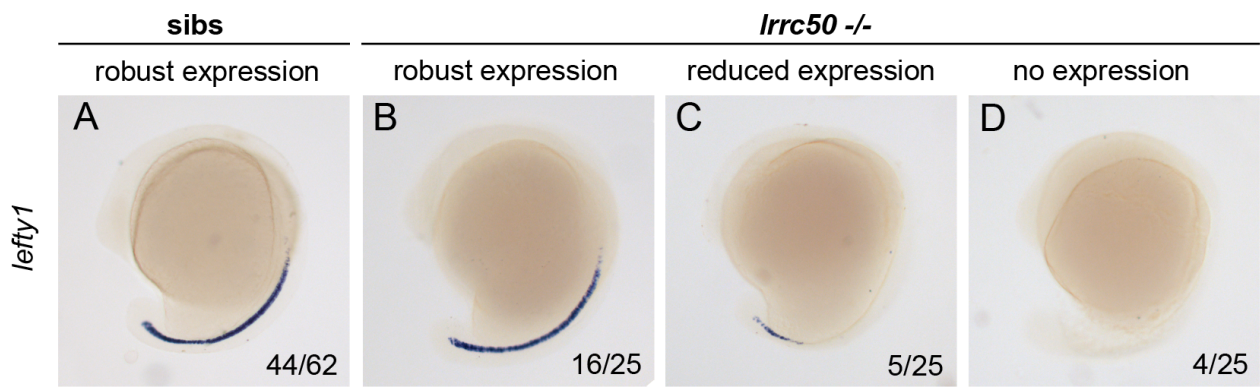

Figure S6
